# Supplementary material
Source: PubMed Central journal article supplement (PMC3864834)
Supplement: NIHMS509294-supplement-1.pdf [file NIHMS509294-supplement-1.pdf]

## SUPPLEMENTAL MATERIAL

### Supplemental Tables

**Supplemental Table 1.** Selected polymorphisms

| Gene          | rs number  | References          | Minor allele frequency in European (1000Genomes) | Minor allele frequency in East Asian (1000Genomes) | Minor allele frequency in European (Hapmap) | Minor allele frequency in Japanese (Hapmap) |
|---------------|------------|---------------------|--------------------------------------------------|----------------------------------------------------|---------------------------------------------|---------------------------------------------|
| <i>ADRA2C</i> | rs61767072 | 1                   | -                                                | -                                                  | -                                           | -                                           |
| <i>ADRB1</i>  | rs1801252  | 2                   | 0.216                                            | 0.273                                              | -                                           | 0                                           |
| <i>ADRB1</i>  | rs1801253  | 1, 2                | 0.227                                            | 0.168                                              | 0.308                                       | 0.151                                       |
| <i>ADRB2</i>  | rs28365031 | 3                   | -                                                | -                                                  | -                                           | -                                           |
| <i>ATP1B1</i> | rs10919071 | 4, 5                | 0.125                                            | 0.023                                              | 0.129                                       | -                                           |
| <i>KCNE1</i>  | rs1805128  | 5-9                 | 0.009                                            | 0.003                                              | 0.023                                       | 0.011                                       |
| <i>KCNH2</i>  | rs1805123  | 5, 7, 9-12          | 0.177                                            | 0.031                                              | 0.239                                       | 0.035                                       |
| <i>KCNH2</i>  | rs3778873  | 4                   | 0.170                                            | 0.302                                              | 0.162                                       | 0.284                                       |
| <i>KCNH2</i>  | rs3807375  | 4, 9, 12, 13        | 0.359                                            | 0.762                                              | 0.376                                       | 0.805                                       |
| <i>KCNH2</i>  | rs3815459  | 4, 11, 14           | 0.223                                            | 0.736                                              | -                                           | 0.807                                       |
| <i>KCNJ2</i>  | rs17779747 | 4                   | 0.340                                            | 0.077                                              | 0.310                                       | 0.088                                       |
| <i>KCNQ1</i>  | rs12296050 | 4, 13               | 0.244                                            | 0.374                                              | 0.186                                       | 0.372                                       |
| <i>KCNQ1</i>  | rs2074238  | 5, 6                | 0.065                                            | 0.033                                              | 0.065                                       | 0.045                                       |
| <i>KCNQ1</i>  | rs757092   | 11, 14              | 0.405                                            | 0.369                                              | 0.346                                       | 0.367                                       |
| <i>NOS1AP</i> | rs10494366 | 4, 9, 13, 15-22     | 0.361                                            | 0.647                                              | 0.350                                       | 0.686                                       |
| <i>NOS1AP</i> | rs12029454 | 6, 13               | 0.177                                            | 0.358                                              | 0.146                                       | 0.367                                       |
| <i>NOS1AP</i> | rs12143842 | 4-6, 13, 18, 23, 24 | 0.244                                            | 0.318                                              | 0.188                                       | 0.363                                       |
| <i>NOS1AP</i> | rs16857031 | 6                   | 0.119                                            | 0.205                                              | 0.141                                       | 0.136                                       |
| <i>NOS1AP</i> | rs4657139  | 9, 15, 16, 19, 25   | 0.344                                            | 0.696                                              | 0.292                                       | 0.750                                       |
| <i>NOS1AP</i> | rs4657178  | 4                   | 0.284                                            | 0.517                                              | 0.257                                       | 0.500                                       |
| <i>CNOT3</i>  | rs36643    | 26                  | 0.380                                            | 0.220                                              | 0.350                                       | 0.181                                       |
| <i>PLN</i>    | rs11970286 | 4                   | 0.460                                            | 0.217                                              | 0.491                                       | 0.155                                       |
| <i>PLN</i>    | rs12210810 | 4, 5                | 0.049                                            | 0.000                                              | 0.081                                       | 0                                           |
| <i>SCN5A</i>  | rs12053903 | 5, 6                | 0.372                                            | 0.556                                              | 0.301                                       | 0.522                                       |
| <i>SCN5A</i>  | rs1805124  | 7, 9, 27            | 0.183                                            | 0.103                                              | 0.179                                       | 0.129                                       |

Minor alleles were defined according to alleles frequencies in Europeans.

**Supplemental Table 2.** Methods and primers used for genotyping

**A. FRET**

| <b>Gene</b>   | <b>rs number</b> | <b>Forward primer</b>     | <b>Reverse primer</b>  | <b>Anchor probe (Red640)</b> | <b>Sensor probe</b>     |
|---------------|------------------|---------------------------|------------------------|------------------------------|-------------------------|
| <i>KCNH2</i>  | rs1805123        | CCCGGCAGTACGGAGTTA        | AAGGTCTGAGGCCTGGGTA    | CGCCTGCGGAAGGACAACCTTGC      | GCCTCACCCGTGTCCGT       |
| <i>NOS1AP</i> | rs12029454*      | TATTTATTCATTTAAACACGGGGTG | GTATTGGCTCAAAAAGGGAAGT | GACAGTTCTAATCATTCCATCACACGCT | TTGATTGTTTCCTTTGACTGAGA |

SNP allelic variants are bolded

\* in the discovery cohort

**B. HRM with an unlabeled probe**

| <b>Gene</b>  | <b>rs number</b> | <b>Forward primer</b>    | <b>Reverse primer</b>    | <b>Probe</b>                  |
|--------------|------------------|--------------------------|--------------------------|-------------------------------|
| <i>KCNQ1</i> | rs12296050       | GTGCTTAGACTGTGCCCG       | GGGAGACCCTGTCTCGAA       | CTCCTGGGCTCCTAACCTTTCACAG-3'P |
| <i>SCN5A</i> | rs12053903       | GGTCCTCAAACCACACTTTGAATA | CCATCTTCTACATCTTGGGTTCTC | GCTGGGTGGGCAAGATACTAAGCAG-3'P |

SNP allelic variants are bolded

**C. Sequencing**

| <b>Gene</b>   | <b>rs number</b> | <b>Forward primer</b> | <b>Reverse primer</b>    |
|---------------|------------------|-----------------------|--------------------------|
| <i>ADRA2C</i> | rs61767072       | AGCCGGACGAGAGCAGCGCA  | AGGCCTCGCGGCAGATGCCGTACA |
| <i>ADRB2</i>  | rs28365031       | AACGGACACTCGAAGTCCAC  | GCTGAAGAAGAAGGGGAACC     |

**D. Taqman**

| <b>Gene</b>   | <b>rs number</b> | <b>Applied Biosystems Taqman Assay</b> |
|---------------|------------------|----------------------------------------|
| <i>ADRB1</i>  | rs1801252        | C__8898508_10                          |
| <i>ADRB1</i>  | rs1801253        | C__8898494_10                          |
| <i>ATP1B1</i> | rs10919071       | C__1264222_10                          |
| <i>KCNH2</i>  | rs3815459        | C__3219498_10                          |

| Gene          | rs number               | Applied Biosystems Taqman Assay |
|---------------|-------------------------|---------------------------------|
| <i>KCNQ1</i>  | rs2074238 <sup>†</sup>  | C__15862454_10                  |
| <i>KCNQ1</i>  | rs757092                | C__2990605_10                   |
| <i>NOS1AP</i> | rs4657139               | C__1777005_10                   |
| <i>NOS1AP</i> | rs4657178               | C__133678_10                    |
| <i>NOS1AP</i> | rs12029454 <sup>‡</sup> | C__31087211_10                  |
| <i>SCN5A</i>  | rs1805124               | C__11987864_10                  |

<sup>†</sup> in the discovery and the replication populations

<sup>‡</sup> in the replication populations

#### E. T<sub>m</sub> shift primers

| Gene          | rs number  | Allele-specific primers                        |                                      | Common primer              |
|---------------|------------|------------------------------------------------|--------------------------------------|----------------------------|
| <i>KCNE1</i>  | rs1805128  | <u>GCGGGCAGGGCGGGC</u> TCCTTCTCTTGCCAGGCcTC    | <u>GCGGGCGTCCTTCTCTTGCCAGGCcTT</u>   | CTGAGCTACATCCGCTCCAAGAA    |
| <i>KCNH2</i>  | rs3778873  | <u>GCGGGCAGGGCGGGC</u> CACCTAATCCAACCCATcCG    | <u>GCGGGCCACCTAATCCAACCCATcCC</u>    | ACTGGTCATCAGACCTCTGCTTCT   |
| <i>KCNH2</i>  | rs3807375  | <u>GCGGGCAGGGCGGGC</u> TAGAGAACTTCTGCGTTTAAaAG | <u>GCGGGCTAGAGAACTTCTGCGTTTAAaAA</u> | CTCTATACTGGGAGGGGGCAATG    |
| <i>KCNJ2</i>  | rs17779747 | <u>GCGGGCAGGGCGGGC</u> CAAAGACAGAATTCTGGCcAC   | <u>GCGGGCCAAAGACAGAATTCTGGCcAA</u>   | CACTCACAGTTCCAGGATTTCTT    |
| <i>NOS1AP</i> | rs10494366 | <u>GCGGGCAGGGCGGGC</u> ATATTTATGGGAGGTATGCgGG  | <u>GCGGGCATATTTATGGGAGGTATGCgGT</u>  | GAGATGTGTCTAGATAGAGACCAGTA |
| <i>NOS1AP</i> | rs12143842 | <u>GCGGGCAGGGCGGGC</u> CCAGGGTCACATCCCAGcTC    | <u>GCGGGCCAGGGTCACATCCCAGcTT</u>     | TGGGAACAGAGTCAGGAGACAGC    |
| <i>NOS1AP</i> | rs16857031 | <u>GCGGGCAGGGCGGGC</u> CTAACTATGACACTGCTCAtAG  | <u>GCGGGCCTAACTATGACACTGCTCAtAC</u>  | GCAAATGTGACAGGGTGTTTACC    |
| <i>CNOT3</i>  | rs36643    | <u>GCGGGCAGGGCGGGC</u> AGAGGAGAATGACTGTaCC     | <u>GCGGGCAGAGGAGAATGACTGTaCT</u>     | CGTGCATAGCAGAATTGGTTGG     |
| <i>PLN</i>    | rs11970286 | <u>GCGGGCAGGGCGGGC</u> CCAAAGGCATGAGAACTcGC    | <u>GCGGGCCAAAGGCATGAGAACTcGT</u>     | GGCTCATAACCCCTCACCTACCTT   |
| <i>PLN</i>    | rs12210810 | <u>GCGGGCAGGGCGGGC</u> CACTGTCCTGTGTTACACAAaAG | <u>GCGGGCCACTGTCCTGTGTTACACAAaAC</u> | CTGACATCAGTCTTATTCTGATTACA |

The GC-rich tails are underlined

SNP allelic variants are bolded

Mismatched nucleotides are in lowercase

**Supplemental Table 3.** Sequencing primers used for validating other genotyping methods

| <b>Gene</b>   | <b>rs number</b> | <b>Forward primer</b>      | <b>Reverse primer</b>     |
|---------------|------------------|----------------------------|---------------------------|
| <i>ADRB1</i>  | rs1801252        | CCGGGCTTCTGGGGTGTTC        | GGCGAGGTGATGGCGAGGTAGC    |
| <i>ADRB1</i>  | rs1801253        | TTCAACCCCATCATCTACTGC      | GGCCCTACACCTTGGATTC       |
| <i>ATP1B1</i> | rs10919071       | TGCTTTCAAGTATAAGTCTCAGTG   | GGAGAACTGACATCAGTCTTATT   |
| <i>KCNE1</i>  | rs1805128        | G TTCAGCAGGGTGGCAACAT      | GCCAGATGGTTTTCAACGACA     |
| <i>KCNH2</i>  | rs1805123        | CTGGGGCAAATCACATTG         | AAGGGATGGGAAGGTCTGAG      |
| <i>KCNH2</i>  | rs3778873        | GAGGAGTTATTGTGGGATCACCTA   | GACAAGTTTGAACCTGGGCTG     |
| <i>KCNH2</i>  | rs3807375        | CTATACTGGGAGGGGGCAAT       | AGAGTTTGATGGTGGCCTTG      |
| <i>KCNH2</i>  | rs3815459        | GGGCTAGGAATGGAAGAAGG       | CTCACCCAGCTCTGCTCTCT      |
| <i>KCNJ2</i>  | rs17779747       | CACCTCACAGTTCAGGATTTCTT    | CACAGGCATTCACTGCAGAT      |
| <i>KCNQ1</i>  | rs12296050       | GTGCTTAGACTGTGCCCG         | GGGAGACCCTGTCTCGAA        |
| <i>KCNQ1</i>  | rs2074238        | CTCAAGGAGCCTGGTACAGC       | GCAATGTCTTGTGAGGAGCA      |
| <i>KCNQ1</i>  | rs757092         | CACAGGGACACACCCATGTA       | GTTCTGCTACCGAGGCTGTC      |
| <i>NOS1AP</i> | rs10494366       | GGTGAGGTCACTCTCTGAAC       | CACCCAGAGAGATGTGTCCTA     |
| <i>NOS1AP</i> | rs12029454       | TATTTATTCATTTAAACACGGGGTG  | GTATTGGCTCAAAAAGGGAAGT    |
| <i>NOS1AP</i> | rs12143842       | GGAGACAACACGAGGACGAT       | GCTGGGAACAGAGTCAGGAG      |
| <i>NOS1AP</i> | rs16857031       | GTGGGGAACATGCCAGTTAT       | AAGACGGAAGTGGTGAATGG      |
| <i>NOS1AP</i> | rs4657139        | CAGAGGTGGTGCAATTCCTT       | TGCAGTCCTTCCCAGTTAC       |
| <i>NOS1AP</i> | rs4657178        | AACAACCCCAAGGGAAAGAT       | CCCCACATAACTGCACACTG      |
| <i>CNOT3</i>  | rs36643          | CCAGACAGGGAAACCGAATA       | CCTCGTCTTTCTCCAAGTGC      |
| <i>PLN</i>    | rs11970286       | GGTGGTGTAATTCAGTCTTGAGTTTG | GGCTCATACACCCTCACCTACCTT  |
| <i>PLN</i>    | rs12210810       | AAGCAGGGATGGGAATCTTT       | CCAGCAATCAACACACTATAGCACC |
| <i>SCN5A</i>  | rs12053903       | GGTCCTCAAACCACACTTTGAATA   | CCATCTTCTACATCTTGGGTTCTC  |
| <i>SCN5A</i>  | rs1805124        | GCCCTCAATGCTCTGAGAAG       | TAATGAGACCACCCCATTC       |

**Supplemental Table 4.** Polymorphism allele frequencies in Caucasian and Japanese LQTS

patients from the discovery cohort

| <b>Gene</b>   | <b>rs number</b> |     | <b>Caucasian</b> |      | <b>Japanese</b> |      |
|---------------|------------------|-----|------------------|------|-----------------|------|
| <i>ADRA2C</i> | rs61767072       |     | Ins              | Del  | Ins             | Del  |
|               |                  | AS  | 0.92             | 0.08 | 0.95            | 0.05 |
|               |                  | S   | 0.92             | 0.08 | 0.95            | 0.05 |
|               |                  | All | 0.92             | 0.08 | 0.95            | 0.05 |
| <i>ADRB1</i>  | rs1801252        |     | A                | G    | A               | G    |
|               |                  | AS  | 0.89             | 0.11 | 0.90            | 0.10 |
|               |                  | S   | 0.88             | 0.12 | 0.85            | 0.15 |
|               |                  | All | 0.89             | 0.11 | 0.88            | 0.12 |
| <i>ADRB1</i>  | rs1801253        |     | C                | G    | C               | G    |
|               |                  | AS  | 0.73             | 0.27 | 0.77            | 0.23 |
|               |                  | S   | 0.68             | 0.32 | 0.79            | 0.21 |
|               |                  | All | 0.71             | 0.29 | 0.78            | 0.22 |
| <i>ADRB2</i>  | rs28365031       |     | Ins              | Del  | Ins             | Del  |
|               |                  | AS  | 0.76             | 0.24 | 0.67            | 0.33 |
|               |                  | S   | 0.77             | 0.23 | 0.62            | 0.38 |
|               |                  | All | 0.76             | 0.24 | 0.65            | 0.35 |
| <i>ATP1B1</i> | rs10919071       |     | A                | G    | A               | G    |
|               |                  | AS  | 0.87             | 0.13 | 0.90            | 0.10 |
|               |                  | S   | 0.87             | 0.13 | 0.94            | 0.06 |
|               |                  | All | 0.87             | 0.13 | 0.92            | 0.08 |
| <i>KCNE1</i>  | rs1805128        |     | C                | T    | C               | T    |
|               |                  | AS  | 0.99             | 0.01 | 0.98            | 0.02 |
|               |                  | S   | 0.95             | 0.05 | 1.00            | 0.00 |
|               |                  | All | 0.97             | 0.03 | 0.99            | 0.01 |
| <i>KCNH2</i>  | rs1805123        |     | A                | C    | A               | C    |
|               |                  | AS  | 0.78             | 0.22 | 0.96            | 0.04 |
|               |                  | S   | 0.81             | 0.19 | 0.99            | 0.01 |
|               |                  | All | 0.80             | 0.20 | 0.98            | 0.02 |
| <i>KCNH2</i>  | rs3778873        |     | G                | C    | G               | C    |
|               |                  | AS  | 0.80             | 0.20 | 0.73            | 0.27 |
|               |                  | S   | 0.80             | 0.20 | 0.66            | 0.34 |
|               |                  | All | 0.80             | 0.20 | 0.70            | 0.30 |
| <i>KCNH2</i>  | rs3807375        |     | C                | T    | C               | T    |
|               |                  | AS  | 0.59             | 0.41 | 0.17            | 0.83 |
|               |                  | S   | 0.61             | 0.39 | 0.18            | 0.82 |
|               |                  | All | 0.60             | 0.40 | 0.18            | 0.82 |

| <b>Gene</b>   | <b>rs number</b> | <b>Caucasian</b> |      | <b>Japanese</b> |      |      |
|---------------|------------------|------------------|------|-----------------|------|------|
| <i>KCNH2</i>  | rs3815459        | C                | T    | C               | T    |      |
|               |                  | AS               | 0.74 | 0.26            | 0.21 | 0.79 |
|               |                  | S                | 0.73 | 0.27            | 0.13 | 0.87 |
|               |                  | All              | 0.73 | 0.27            | 0.17 | 0.83 |
| <i>KCNJ2</i>  | rs17779747       | G                | T    | G               | T    |      |
|               |                  | AS               | 0.73 | 0.27            | 0.90 | 0.10 |
|               |                  | S                | 0.67 | 0.33            | 0.90 | 0.10 |
|               |                  | All              | 0.70 | 0.30            | 0.90 | 0.10 |
| <i>KCNQ1</i>  | rs12296050       | C                | T    | C               | T    |      |
|               |                  | AS               | 0.78 | 0.22            | 0.59 | 0.41 |
|               |                  | S                | 0.75 | 0.25            | 0.56 | 0.44 |
|               |                  | All              | 0.76 | 0.24            | 0.57 | 0.43 |
| <i>KCNQ1</i>  | rs2074238        | C                | T    | C               | T    |      |
|               |                  | AS               | 0.90 | 0.10            | 1.00 | 0.00 |
|               |                  | S                | 0.96 | 0.04            | 1.00 | 0.00 |
|               |                  | All              | 0.93 | 0.07            | 1.00 | 0.00 |
| <i>KCNQ1</i>  | rs757092         | A                | G    | A               | G    |      |
|               |                  | AS               | 0.64 | 0.36            | 0.59 | 0.41 |
|               |                  | S                | 0.63 | 0.37            | 0.62 | 0.38 |
|               |                  | All              | 0.63 | 0.37            | 0.60 | 0.40 |
| <i>NOS1AP</i> | rs10494366       | T                | G    | T               | G    |      |
|               |                  | AS               | 0.65 | 0.35            | 0.27 | 0.73 |
|               |                  | S                | 0.65 | 0.35            | 0.24 | 0.76 |
|               |                  | All              | 0.65 | 0.35            | 0.26 | 0.74 |
| <i>NOS1AP</i> | rs12029454       | G                | A    | G               | A    |      |
|               |                  | AS               | 0.84 | 0.16            | 0.60 | 0.40 |
|               |                  | S                | 0.85 | 0.15            | 0.59 | 0.41 |
|               |                  | All              | 0.84 | 0.16            | 0.59 | 0.41 |
| <i>NOS1AP</i> | rs12143842       | C                | T    | C               | T    |      |
|               |                  | AS               | 0.74 | 0.26            | 0.61 | 0.39 |
|               |                  | S                | 0.69 | 0.31            | 0.61 | 0.39 |
|               |                  | All              | 0.71 | 0.29            | 0.61 | 0.39 |
| <i>NOS1AP</i> | rs16857031       | C                | G    | C               | G    |      |
|               |                  | AS               | 0.85 | 0.15            | 0.87 | 0.13 |
|               |                  | S                | 0.87 | 0.13            | 0.80 | 0.20 |
|               |                  | All              | 0.86 | 0.14            | 0.84 | 0.16 |
| <i>NOS1AP</i> | rs4657139        | T                | A    | T               | A    |      |
|               |                  | AS               | 0.67 | 0.33            | 0.23 | 0.77 |
|               |                  | S                | 0.63 | 0.37            | 0.22 | 0.78 |
|               |                  | All              | 0.65 | 0.35            | 0.23 | 0.77 |

| <b>Gene</b>   | <b>rs number</b> | <b>Caucasian</b> |      | <b>Japanese</b> |      |      |
|---------------|------------------|------------------|------|-----------------|------|------|
| <i>NOS1AP</i> | rs4657178        | C                | T    | C               | T    |      |
|               |                  | AS               | 0.70 | 0.30            | 0.46 | 0.54 |
|               |                  | S                | 0.70 | 0.30            | 0.44 | 0.56 |
|               |                  | All              | 0.70 | 0.30            | 0.45 | 0.55 |
| <i>CNOT3</i>  | rs36643          | T                | C    | T               | C    |      |
|               |                  | AS               | 0.58 | 0.42            | 0.70 | 0.30 |
|               |                  | S                | 0.58 | 0.42            | 0.68 | 0.32 |
|               |                  | All              | 0.58 | 0.42            | 0.69 | 0.31 |
| <i>PLN</i>    | rs11970286       | C                | T    | C               | T    |      |
|               |                  | AS               | 0.54 | 0.46            | 0.78 | 0.22 |
|               |                  | S                | 0.53 | 0.47            | 0.77 | 0.23 |
| <i>PLN</i>    | rs12210810       | All              | 0.54 | 0.46            | 0.77 | 0.23 |
|               |                  | G                | C    | G               | C    |      |
|               |                  | AS               | 0.95 | 0.05            | 1.00 | 0.00 |
| <i>SCN5A</i>  | rs12053903       | S                | 0.99 | 0.01            | 1.00 | 0.00 |
|               |                  | All              | 0.97 | 0.03            | 1.00 | 0.00 |
|               |                  | A                | G    | A               | G    |      |
| <i>SCN5A</i>  | rs1805124        | AS               | 0.70 | 0.30            | 0.45 | 0.55 |
|               |                  | S                | 0.67 | 0.33            | 0.50 | 0.50 |
|               |                  | All              | 0.69 | 0.31            | 0.48 | 0.52 |
| <i>SCN5A</i>  | rs1805124        | A                | G    | A               | G    |      |
|               |                  | AS               | 0.80 | 0.20            | 0.91 | 0.09 |
|               |                  | S                | 0.79 | 0.21            | 0.94 | 0.06 |
| <i>SCN5A</i>  | rs1805124        | All              | 0.79 | 0.21            | 0.93 | 0.07 |

Asymptomatic patients (AS)

Symptomatic patients (S)

**Supplemental Table 5.** Polymorphism genotypes in Caucasian and Japanese LQTS patients

from the discovery cohort

| Gene          | rs number  | Caucasian |       |             | Japanese          |       |             |                   |
|---------------|------------|-----------|-------|-------------|-------------------|-------|-------------|-------------------|
| <i>ADRA2C</i> | rs61767072 | II        | ID+DD | OR [95% CI] | II                | ID+DD | OR [95% CI] |                   |
|               |            | AS        | 60    | 11          | 1.11 [0.60-2.05]  | 37    | 4           | 1.00 [0.37-2.72]  |
|               |            | S         | 59    | 12          |                   | 37    | 4           |                   |
| <i>ADRB1</i>  | rs1801252  | AA        | AG+GG | OR [95% CI] | AA                | AG+GG | OR [95% CI] |                   |
|               |            | AS        | 57    | 14          | 1.28 [0.68-2.41]  | 33    | 8           | 1.51 [0.75-3.04]  |
|               |            | S         | 54    | 17          |                   | 30    | 11          |                   |
| <i>ADRB1</i>  | rs1801253  | CC        | CG+GG | OR [95% CI] | CC                | CG+GG | OR [95% CI] |                   |
|               |            | AS        | 39    | 32          | 1.33 [0.80-2.21]  | 25    | 16          | 1.00 [0.56-1.78]  |
|               |            | S         | 34    | 37          |                   | 25    | 16          |                   |
| <i>ADRB2</i>  | rs28365031 | II        | ID+DD | OR [95% CI] | II                | ID+DD | OR [95% CI] |                   |
|               |            | AS        | 39    | 32          | 0.75 [0.43-1.30]  | 19    | 22          | 1.50 [0.75-2.98]  |
|               |            | S         | 44    | 27          |                   | 15    | 26          |                   |
| <i>ATP1B1</i> | rs10919071 | AA        | AG+GG | OR [95% CI] | AA                | AG+GG | OR [95% CI] |                   |
|               |            | AS        | 52    | 19          | 0.86 [0.46-1.61]  | 35    | 6           | 0.81 [0.40-1.66]  |
|               |            | S         | 54    | 17          |                   | 36    | 5           |                   |
| <i>KCNE1</i>  | rs1805128  | CC        | CT+TT | OR [95% CI] | CC                | CT+TT | OR [95% CI] |                   |
|               |            | AS        | 70    | 1           | 7.66 [1.21-48.31] | 39    | 2           | -                 |
|               |            | S         | 64    | 7           |                   | 41    | 0           |                   |
| <i>KCNH2</i>  | rs1805123  | AA        | AC+CC | OR [95% CI] | AA                | AC+CC | OR [95% CI] |                   |
|               |            | AS        | 43    | 28          | 0.78 [0.49-1.27]  | 38    | 3           | 0.32 [0.05-2.15]  |
|               |            | S         | 47    | 24          |                   | 40    | 1           |                   |
| <i>KCNH2</i>  | rs3778873  | GG        | GC+CC | OR [95% CI] | GG                | GC+CC | OR [95% CI] |                   |
|               |            | AS        | 46    | 25          | 1.13 [0.69-1.86]  | 19    | 22          | 1.35 [0.74-2.46]  |
|               |            | S         | 44    | 27          |                   | 16    | 25          |                   |
| <i>KCNH2</i>  | rs3807375  | CC        | CT+TT | OR [95% CI] | CC                | CT+TT | OR [95% CI] |                   |
|               |            | AS        | 27    | 44          | 0.94 [0.53-1.68]  | 0     | 41          | -                 |
|               |            | S         | 28    | 43          |                   | 2     | 39          |                   |
| <i>KCNH2</i>  | rs3815459  | CC        | CT+TT | OR [95% CI] | CC                | CT+TT | OR [95% CI] |                   |
|               |            | AS        | 40    | 31          | 1.12 [0.67-1.88]  | 1     | 40          | 1.00 [0.06-17.17] |
|               |            | S         | 38    | 33          |                   | 1     | 40          |                   |
| <i>KCNJ2</i>  | rs17779747 | GG        | GT+TT | OR [95% CI] | GG                | GT+TT | OR [95% CI] |                   |
|               |            | AS        | 37    | 34          | 1.18 [0.69-2.03]  | 35    | 6           | 1.41 [0.62-3.25]  |
|               |            | S         | 34    | 37          |                   | 33    | 8           |                   |
| <i>KCNQ1</i>  | rs12296050 | CC        | CT+TT | OR [95% CI] | CC                | CT+TT | OR [95% CI] |                   |
|               |            | AS        | 45    | 26          | 1.50 [0.85-2.66]  | 15    | 26          | 1.00 [0.55-1.81]  |
|               |            | S         | 38    | 33          |                   | 15    | 26          |                   |
| <i>KCNQ1</i>  | rs2074238  | CC        | CT+TT | OR [95% CI] | CC                | CT+TT | OR [95% CI] |                   |
|               |            | AS        | 57    | 14          | 0.38 [0.19-0.73]  | 41    | 0           | -                 |
|               |            | S         | 65    | 6           |                   | 41    | 0           |                   |
| <i>KCNQ1</i>  | rs757092   | AA        | AG+GG | OR [95% CI] | AA                | AG+GG | OR [95% CI] |                   |
|               |            | AS        | 27    | 44          | 0.94 [0.51-1.75]  | 12    | 29          | 0.65 [0.33-1.27]  |
|               |            | S         | 28    | 43          |                   | 16    | 25          |                   |



| Gene          | rs number  | Caucasian |       |             | Japanese         |       |             |                  |
|---------------|------------|-----------|-------|-------------|------------------|-------|-------------|------------------|
|               |            | AS        | S     | OR [95% CI] | AS               | S     | OR [95% CI] |                  |
| <i>NOS1AP</i> | rs10494366 | TT        | TG+GG | OR [95% CI] | TT               | TG+GG | OR [95% CI] |                  |
|               |            | AS        | 25    | 46          | 0.59 [0.33-1.07] | 3     | 38          | 1.00 [0.24-4.11] |
|               |            | S         | 34    | 37          |                  | 3     | 38          |                  |
| <i>NOS1AP</i> | rs12029454 | GG        | GA+AA | OR [95% CI] | GG               | GA+AA | OR [95% CI] |                  |
|               |            | AS        | 50    | 21          | 1.00 [0.59-1.71] | 14    | 27          | 1.00 [0.51-1.98] |
|               |            | S         | 50    | 21          |                  | 14    | 27          |                  |
| <i>NOS1AP</i> | rs12143842 | CC        | CT+TT | OR [95% CI] | CC               | CT+TT | OR [95% CI] |                  |
|               |            | AS        | 37    | 34          | 1.00 [0.56-1.77] | 15    | 26          | 0.90 [0.39-2.11] |
|               |            | S         | 37    | 34          |                  | 16    | 25          |                  |
| <i>NOS1AP</i> | rs16857031 | CC        | CG+GG | OR [95% CI] | CC               | CG+GG | OR [95% CI] |                  |
|               |            | AS        | 52    | 19          | 0.86 [0.45-1.65] | 31    | 10          | 1.98 [1.07-3.67] |
|               |            | S         | 54    | 17          |                  | 25    | 16          |                  |
| <i>NOS1AP</i> | rs4657139  | TT        | TA+AA | OR [95% CI] | TT               | TA+AA | OR [95% CI] |                  |
|               |            | AS        | 29    | 42          | 0.84 [0.45-1.59] | 0     | 41          | -                |
|               |            | S         | 32    | 39          |                  | 3     | 38          |                  |
| <i>NOS1AP</i> | rs4657178  | CC        | CT+TT | OR [95% CI] | CC               | CT+TT | OR [95% CI] |                  |
|               |            | AS        | 35    | 36          | 1.00 [0.64-1.57] | 9     | 32          | 1.16 [0.44-3.07] |
|               |            | S         | 35    | 36          |                  | 8     | 33          |                  |
| <i>CNOT3</i>  | rs36643    | TT        | TC+CC | OR [95% CI] | TT               | TC+CC | OR [95% CI] |                  |
|               |            | AS        | 22    | 49          | 0.94 [0.57-1.54] | 20    | 21          | 0.91 [0.47-1.74] |
|               |            | S         | 23    | 48          |                  | 21    | 20          |                  |
| <i>PLN</i>    | rs11970286 | CC        | CT+TT | OR [95% CI] | CC               | CT+TT | OR [95% CI] |                  |
|               |            | AS        | 23    | 48          | 1.22 [0.72-2.08] | 24    | 17          | 0.81 [0.50-1.34] |
|               |            | S         | 20    | 51          |                  | 26    | 15          |                  |
| <i>PLN</i>    | rs12210810 | GG        | GC+CC | OR [95% CI] | GG               | GC+CC | OR [95% CI] |                  |
|               |            | AS        | 64    | 7           | 0.27 [0.05-1.38] | 41    | 0           | -                |
|               |            | S         | 69    | 2           |                  | 41    | 0           |                  |
| <i>SCN5A</i>  | rs12053903 | AA        | AG+GG | OR [95% CI] | AA               | AG+GG | OR [95% CI] |                  |
|               |            | AS        | 35    | 36          | 1.33 [0.73-2.42] | 7     | 34          | 0.85 [0.41-1.74] |
|               |            | S         | 30    | 41          |                  | 8     | 33          |                  |
| <i>SCN5A</i>  | rs1805124  | AA        | AG+GG | OR [95% CI] | AA               | AG+GG | OR [95% CI] |                  |
|               |            | AS        | 43    | 28          | 0.84 [0.48-1.44] | 36    | 5           | 1.00 [0.41-2.45] |
|               |            | S         | 46    | 25          |                  | 36    | 5           |                  |

Asymptomatic patients (AS)

Symptomatic patients (S)

Insertion (I)

Deletion (D)

**Supplemental Table 6.** QTc duration in Caucasian and Japanese LQTS patients from the discovery cohort presented by rs12029454 genotype

| Gene          | SNP        |           | AA       |    | Aa and aa |    |
|---------------|------------|-----------|----------|----|-----------|----|
|               |            |           | QTc (ms) | n  | QTc (ms)  | n  |
| <i>NOS1AP</i> | rs12029454 | Caucasian | 474 ± 43 | 97 | 485 ± 43  | 41 |
|               |            | Japanese  | 463 ± 49 | 28 | 483 ± 54  | 54 |

**Supplemental Table 7.** Power to detect previously reported effect on cardiac events or QTc in LQTS patients or healthy populations in our discovery cohort

A. Power to detect previously reported effect on cardiac events in LQTS patients in our discovery cohort

| SNP                     | Previously reported effect |                     | Power <sup>‡</sup> |
|-------------------------|----------------------------|---------------------|--------------------|
|                         | OR                         | References          |                    |
| rs10494366              | 1.42                       | Tomas et al., 2010  | 30%                |
| rs12143842 <sup>*</sup> | 1.40                       | Crotti et al., 2009 | 35 %               |
| rs4657139               | 1.38                       | Tomas et al., 2010  | 27%                |
|                         | 1.80                       | Crotti et al., 2009 | 58%                |

B. Power to detect previously reported effect on QTc in LQTS patients in our discovery cohort

| SNP                     | Previously reported effect |                    | Power <sup>‡</sup> |
|-------------------------|----------------------------|--------------------|--------------------|
|                         | Effect size                | References         |                    |
| rs12143842 <sup>*</sup> | 8 ms                       | Tomas et al., 2010 | 39%                |
| rs4657139               | 7 ms                       | Tomas et al., 2010 | 27%                |

C. Power to detect previously reported effect on QTc in healthy populations in our discovery cohort

| SNP                    | Power <sup>‡</sup> |
|------------------------|--------------------|
| rs10919071             | 9-12%              |
| rs1805128              | 14-17%             |
| rs1805123              | 9-12%              |
| rs3778873              | 9%                 |
| rs3807375              | 7-13%              |
| rs3815459              | 8%                 |
| rs17779747             | 7%                 |
| rs12296050             | 8-9%               |
| rs2074238 <sup>§</sup> | 14-19%             |
| rs757092               | 9%                 |
| rs10494366             | 9-14%              |
| rs12029454             | 15%                |
| rs12143842             | 13-21%             |
| rs16857031             | 13%                |

| SNP                     | Power <sup>‡</sup> |
|-------------------------|--------------------|
| rs4657139               | 15%                |
| rs4657178               | 10%                |
| rs36643                 | 7%                 |
| rs11970286              | 8%                 |
| rs12210810 <sup>§</sup> | 7-8%               |
| rs12053903              | 8%                 |
| rs1805124               | 8%                 |

\* Effect reported for rs16847548 which is in strong linkage disequilibrium with rs12143842 ( $r^2 > 0.8$  in Europeans)

<sup>†</sup> Using QUANTO program, we calculated the power to detect previously reported effect, at a significance level of 0.05, under a dominant model, with a prevalence of 35%, according to allele frequencies in our discovery population and for 112 duos constituting our matched case-control study.

<sup>‡</sup> Using QUANTO program, we calculated the power to detect previously reported effect, at a significance level of 0.05, under a dominant model, with a prevalence of 35%, according to allele frequencies in our discovery population and for 224 individuals constituting our LQTS cohort

<sup>§</sup> Power was calculated according to allele frequencies in Caucasian discovery population and for 142 individuals constituting our Caucasian matched case-control study (SNPs non polymorphic in Japanese)

Supplemental Figures

Supplemental Figure 1.

A

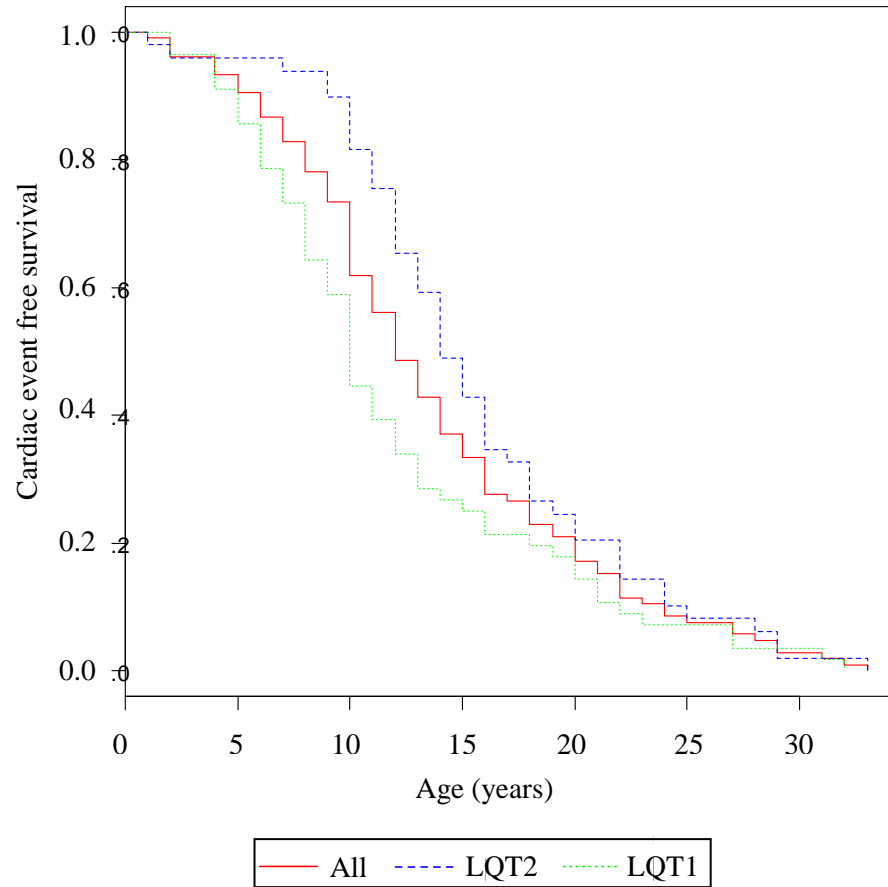

B

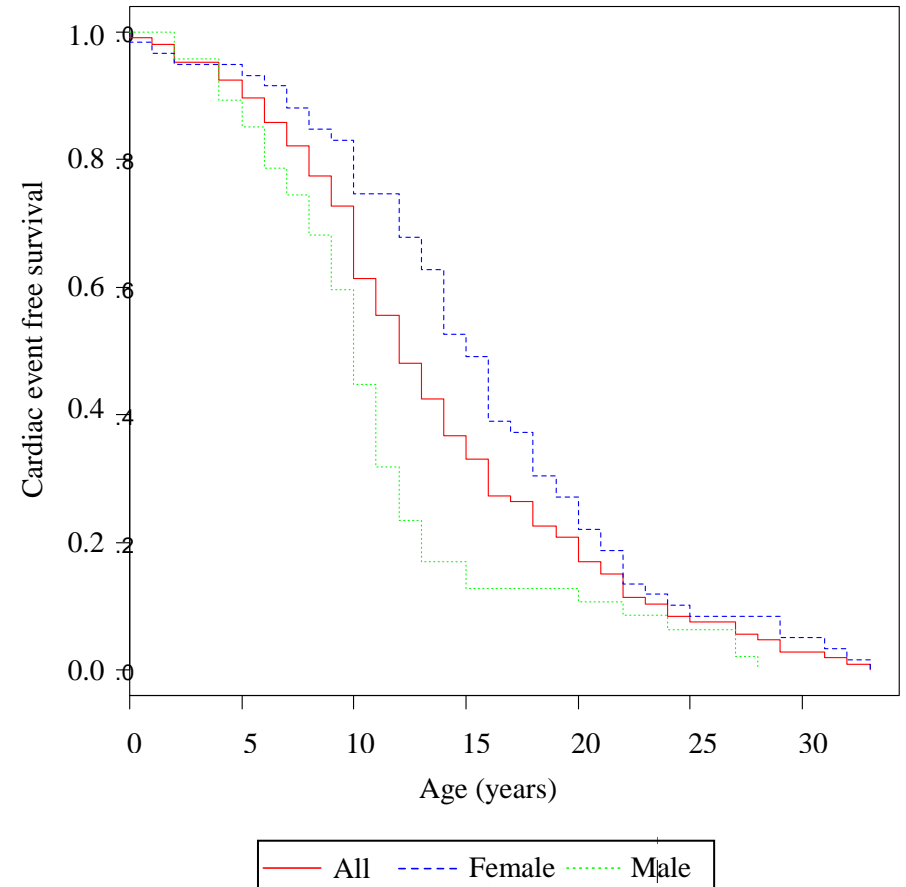

**Supplemental Figure 2.**

**A.**

**KCNH2**

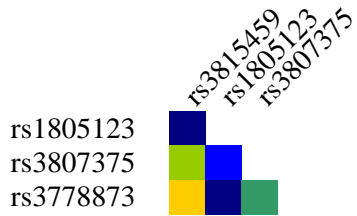

**KCNQ1**

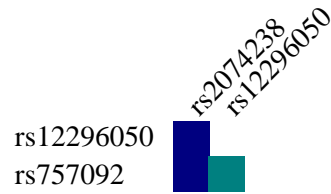

**NOS1AP**

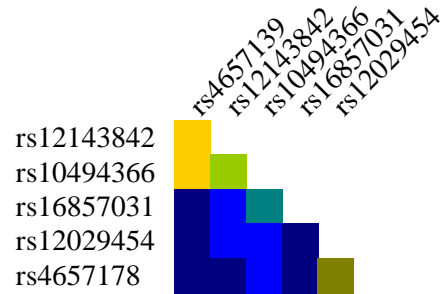

**B.**

**KCNH2**

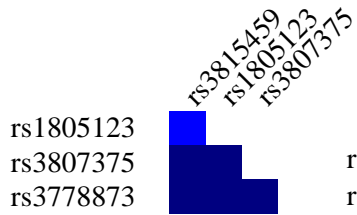

**KCNQ1**

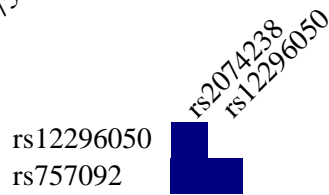

**NOS1AP**

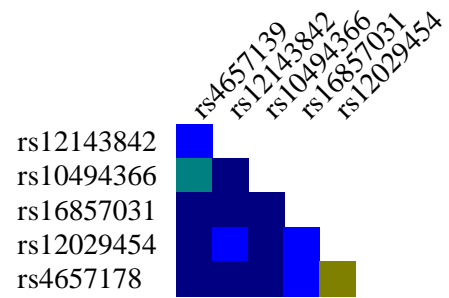

**r<sup>2</sup>**

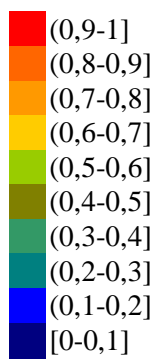

## Supplemental Figures Legends

**Supplemental Figure 1.** Kaplan-Meier curves of survival free from cardiac events among the symptomatic group from the discovery cohort.

The age-related probability of not experiencing a first cardiac event, with birth used as time of origin, was plotted using the Kaplan-Meier method in the symptomatic population by genetic locus (A) or sex (B).

**Supplemental Figure 2.** Pairwise LD between polymorphisms in LQTS patients from the discovery cohort

A. Pairwise LD calculated from asymptomatic Caucasian patients

SNPs in *ADRB1*, *PLN* or *SCN5A* have  $r^2 < 0.1$

B. Pairwise LD calculated from asymptomatic Japanese patients

SNPs in *ADRB1*, *PLN* or *SCN5A* have  $r^2 < 0.1$

## Supplemental References

1. Schwartz PJ, Vanoli E, Crotti L, Spazzolini C, Ferrandi C, Goosen A et al. Neural control of heart rate is an arrhythmia risk modifier in long QT syndrome. *J Am Coll Cardiol*. 2008; 51:920-929.
2. Paavonen KJ, Swan H, Piippo K, Laitinen P, Fodstad H, Sarna S et al. Beta1-adrenergic receptor polymorphisms, QTc interval and occurrence of symptoms in type 1 of long QT syndrome. *Int J Cardiol*. 2007; 118:197-202.
3. Laukkanen JA, Makikallio TH, Kauhanen J, Kurl S. Insertion/deletion polymorphism in alpha2-adrenergic receptor gene is a genetic risk factor for sudden cardiac death. *Am Heart J*. 2009; 158:615-621.
4. Pfeufer A, Sanna S, Arking DE, Muller M, Gateva V, Fuchsberger C et al. Common variants at ten loci modulate the QT interval duration in the QTSCD Study. *Nat Genet*. 2009; 41:407-414.
5. Noseworthy PA, Havulinna AS, Porthan K, Lahtinen AM, Jula A, Karhunen PJ et al. Common Genetic Variants, QT Interval and Sudden Cardiac Death in a Finnish Population-Based Study. *Circ Cardiovasc Genet*. 2011; 4:305-311.
6. Newton-Cheh C, Eijgelsheim M, Rice KM, de Bakker PI, Yin X, Estrada K et al. Common variants at ten loci influence QT interval duration in the QTGEN Study. *Nat Genet*. 2009; 41:399-406.
7. Gouas L, Nicaud V, Berthet M, Forhan A, Tired L, Balkau B et al. Association of KCNQ1, KCNE1, KCNH2 and SCN5A polymorphisms with QTc interval length in a healthy population. *Eur J Hum Genet*. 2005; 13:1213-1222.
8. Lahtinen AM, Marjamaa A, Swan H, Kontula K. KCNE1 D85N polymorphism - a sex-specific modifier in type 1 long QT syndrome? *BMC Med Genet*. 2011; 12:11-17.
9. Marjamaa A, Newton-Cheh C, Porthan K, Reunanen A, Lahermo P, Vaananen H et al. Common candidate gene variants are associated with QT interval duration in the general population. *J Intern Med*. 2009; 265:448-458.
10. Bezzina CR, Verkerk AO, Busjahn A, Jeron A, Erdmann J, Koopmann TT et al. A common polymorphism in KCNH2 (HERG) hastens cardiac repolarization. *Cardiovasc Res*. 2003; 59:27-36.
11. Pfeufer A, Jalilzadeh S, Perz S, Mueller JC, Hinterseer M, Illig T et al. Common variants in myocardial ion channel genes modify the QT interval in the general population: results from the KORA study. *Circ Res*. 2005; 96:693-701.
12. Newton-Cheh C, Guo CY, Larson MG, Musone SL, Surti A, Camargo AL et al. Common genetic variation in KCNH2 is associated with QT interval duration: the Framingham Heart Study. *Circulation*. 2007; 116:1128-1136.
13. Holm H, Gudbjartsson DF, Arnar DO, Thorleifsson G, Thorgeirsson G, Stefansdottir H et al. Several common variants modulate heart rate, PR interval and QRS duration. *Nat Genet*. 2010; 42:117-122.
14. Gouas L, Nicaud V, Chaouch S, Berthet M, Forhan A, Tichet J et al. Confirmation of associations between ion channel gene SNPs and QTc interval duration in healthy subjects. *Eur J Hum Genet*. 2007; 15:974-979.
15. Arking DE, Pfeufer A, Post W, Kao WH, Newton-Cheh C, Ikeda M et al. A common genetic variant in the NOS1 regulator NOS1AP modulates cardiac repolarization. *Nat Genet*. 2006; 38:644-651.
16. Tomas M, Napolitano C, De Giuli L, Bloise R, Subirana I, Malovini A et al. Polymorphisms in the NOS1AP gene modulate QT interval duration and risk of arrhythmias in the long QT syndrome. *J Am Coll Cardiol*. 2010; 55:2745-2752.



17. Aarnoudse AJ, Newton-Cheh C, de Bakker PI, Straus SM, Kors JA, Hofman A et al. Common NOS1AP variants are associated with a prolonged QTc interval in the Rotterdam Study. *Circulation*. 2007; 116:10-16.
18. Eijgelsheim M, Aarnoudse AL, Rivadeneira F, Kors JA, Witteman JC, Hofman A et al. Identification of a common variant at the NOS1AP locus strongly associated to QT-interval duration. *Hum Mol Genet*. 2009; 18:347-357.
19. Kao WH, Arking DE, Post W, Rea TD, Sotoodehnia N, Prineas RJ et al. Genetic variations in nitric oxide synthase 1 adaptor protein are associated with sudden cardiac death in US white community-based populations. *Circulation*. 2009; 119:940-951.
20. Post W, Shen H, Damcott C, Arking DE, Kao WH, Sack PA et al. Associations between genetic variants in the NOS1AP (CAPON) gene and cardiac repolarization in the old order Amish. *Hum Hered*. 2007; 64:214-219.
21. Raitakari OT, Blom-Nyholm J, Koskinen TA, Kahonen M, Viikari JS, Lehtimäki T. Common variation in NOS1AP and KCNH2 genes and QT interval duration in young adults. The Cardiovascular Risk in Young Finns Study. *Ann Med*. 2009; 41:144-151.
22. Tobin MD, Kahonen M, Braund P, Nieminen T, Hajat C, Tomaszewski M et al. Gender and effects of a common genetic variant in the NOS1 regulator NOS1AP on cardiac repolarization in 3761 individuals from two independent populations. *Int J Epidemiol*. 2008; 37:1132-1141.
23. Chambers JC, Zhao J, Terracciano CM, Bezzina CR, Zhang W, Kaba R et al. Genetic variation in SCN10A influences cardiac conduction. *Nat Genet*. 2010; 42:149-152.
24. Nolte IM, Wallace C, Newhouse SJ, Waggott D, Fu J, Soranzo N, Gwilliam R et al. Common genetic variation near the phospholamban gene is associated with cardiac repolarisation: meta-analysis of three genome-wide association studies. *PLoS One*. 2009; 4:e6138.
25. Crotti L, Monti MC, Insolia R, Peljto A, Goosen A, Brink PA et al. NOS1AP is a genetic modifier of the long-QT syndrome. *Circulation*. 2009; 120:1657-1663.
26. Neely GG, Kuba K, Cammarato A, Isobe K, Amann S, Zhang L et al. A global in vivo Drosophila RNAi screen identifies NOT3 as a conserved regulator of heart function. *Cell*. 2010; 141:142-153.
27. Aydin A, Bähring S, Dahm S, Guenther UP, Uhlmann R, Busjahn A et al. Single nucleotide polymorphism map of five long-QT genes. *J Mol Med*. 2005; 83:159-165.
